# Supplementary material for: Cleft Lip and Palate in Four Full-Sib Puppies from a Single Litter of Staffordshire Bull Terrier Dogs: An Anatomical and Genetic Study
Source: MDPI journal article supplement (doi:10.3390/ani13172749), 2023-08-29
Supplement: s1 [file s1]

## Supplementary Materials

### Cleft lip and palate in four full-sib puppies from a single litter of Staffordshire Bull Terrier dogs: An anatomical and genetic study

Jakub J. Ruszkowski <sup>1,†</sup>, Joanna Nowacka-Woszek <sup>2,†</sup>, Tomasz Nowak <sup>2</sup>, Jędrzej Rozynek <sup>2</sup>, Katarzyna Serwanska-Leja <sup>1</sup>, Maciej Gogulski <sup>3,4</sup>, Paweł Kolodziejwski <sup>5</sup>, Marek Switonski <sup>2</sup>, Maciej Zdun <sup>1,\*</sup>, Izabela Szczerba <sup>2,\*</sup>

**Table S1.** PCR primers used in the study of the *ADAMTS20*, *DLX6* and *MYH3* genes.

| Gene            | Analyzed variant                               | Primers sequence (genomic location of the studied regions according to CanFam3.1)            | Annealing temperature | Amplicon length |
|-----------------|------------------------------------------------|----------------------------------------------------------------------------------------------|-----------------------|-----------------|
| <i>ADAMTS20</i> | 2 bp deletion (c.1360_1361delAA)               | F: 5' TGTTCACATGATGATAGTTTAAATG<br>R: 5' CCCGGGTCTCTAGAATCACA<br>(chr27:10553360 - 10553759) | 56 °C                 | 400 bp          |
| <i>DLX6</i>     | LINE 1 insertion in intron 2                   | F: 5' ACCATCGCTTTCAGCAAACCT<br>R: 5' CTAGGCCCGAGAATTCCTCCT<br>(chr14:22067918 - 22068089)    | 60 °C                 | 172 bp          |
|                 | control amplicon                               | F: 5' AAAACGGGGAAATCAGGTTC<br>R: 5' ATCTGCAGGCAGGGTCAG<br>(chr14:22067831 - 22068052)        | 60 °C                 | 222 bp          |
| <i>MYH3</i>     | 11-bp deletion and A>G substitution in exon 21 | F: 5' TGAAAACCTTGTGGATGCAGA<br>R: 5' TGATTCACAATGAGCACACG<br>(chr5:34924947 - 34925232)      | 61 °C                 | 286 bp          |

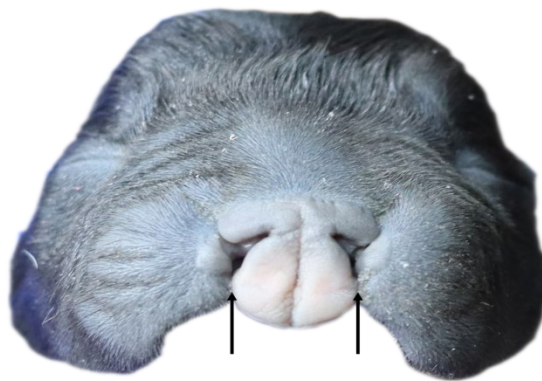

**Figure S1.** Bilateral cleft of the lip in Staffordshire Bull Terrier puppy (case 4). Black arrows indicate the clefts.

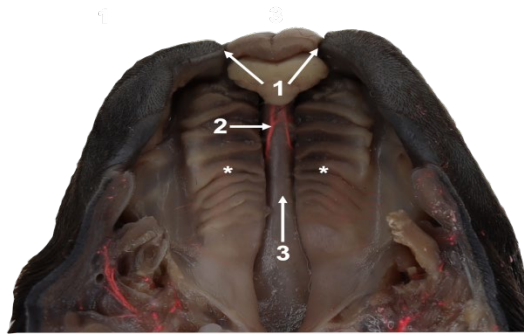

**Figure S2.** Anatomical preparation of the head of the Staffordshire Bull Terrier dog (case 4). The arterial vessels are visible due to the latex injection technique. 1: cleft of the lip; 2: septal nasal artery; 3: vomer; \*: disunited parts of the palate.

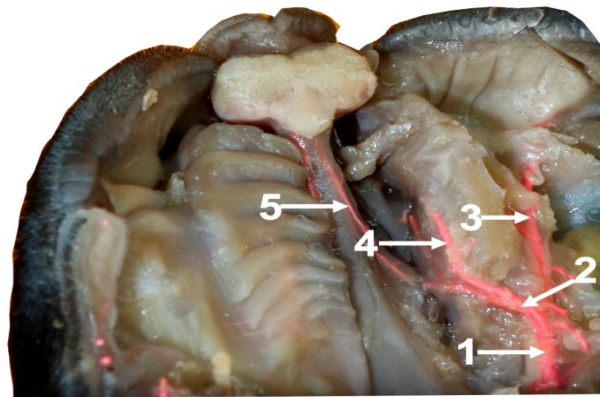

**Figure S3.** Latex preparation of the palatal region of the Staffordshire Bull Terrier puppy (case 1). 1: maxillary artery; 2: descending palatine artery; 3: infraorbital artery; 4: major palatine artery; 5: septal nasal artery.

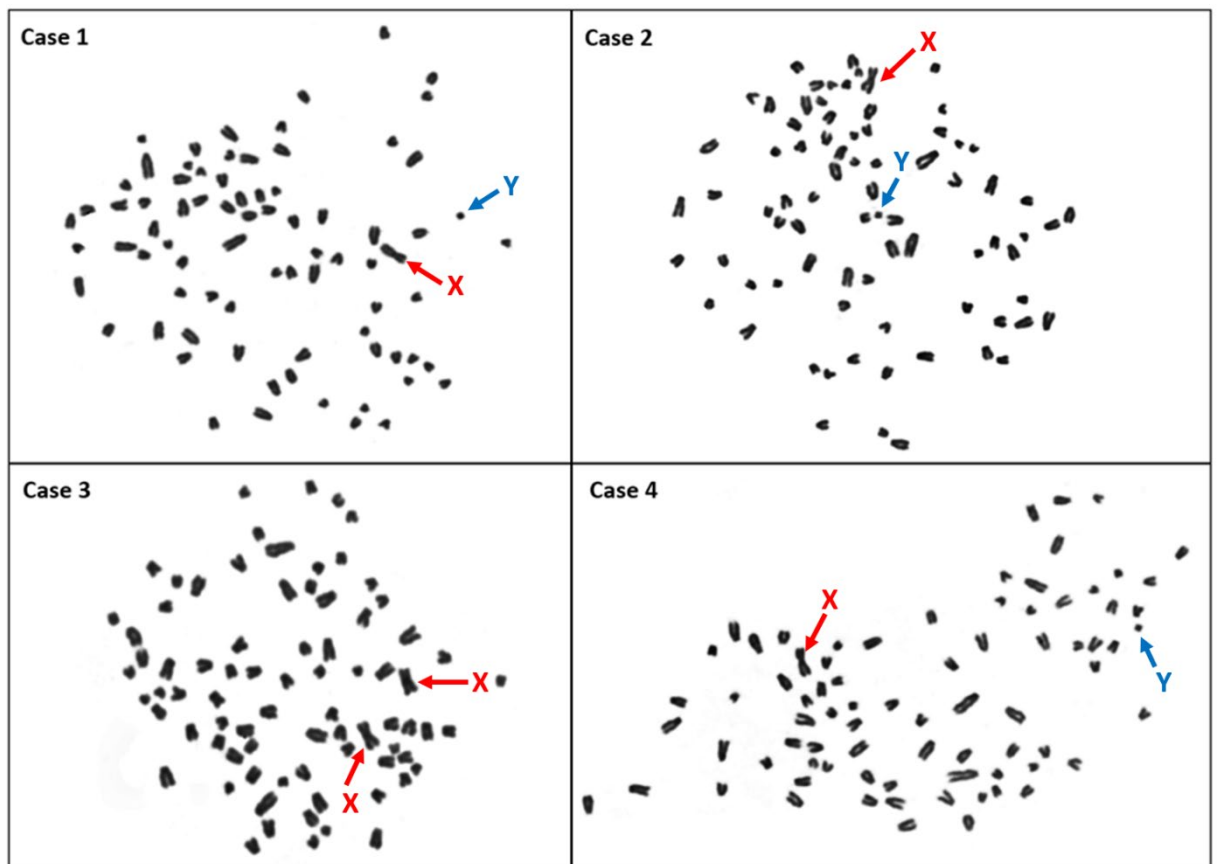

**Figure S4.** Representative metaphase spreads showing normal chromosome complement for male and female dogs in the puppies. Sex chromosomes are indicated by arrows (X: red, Y: blue).

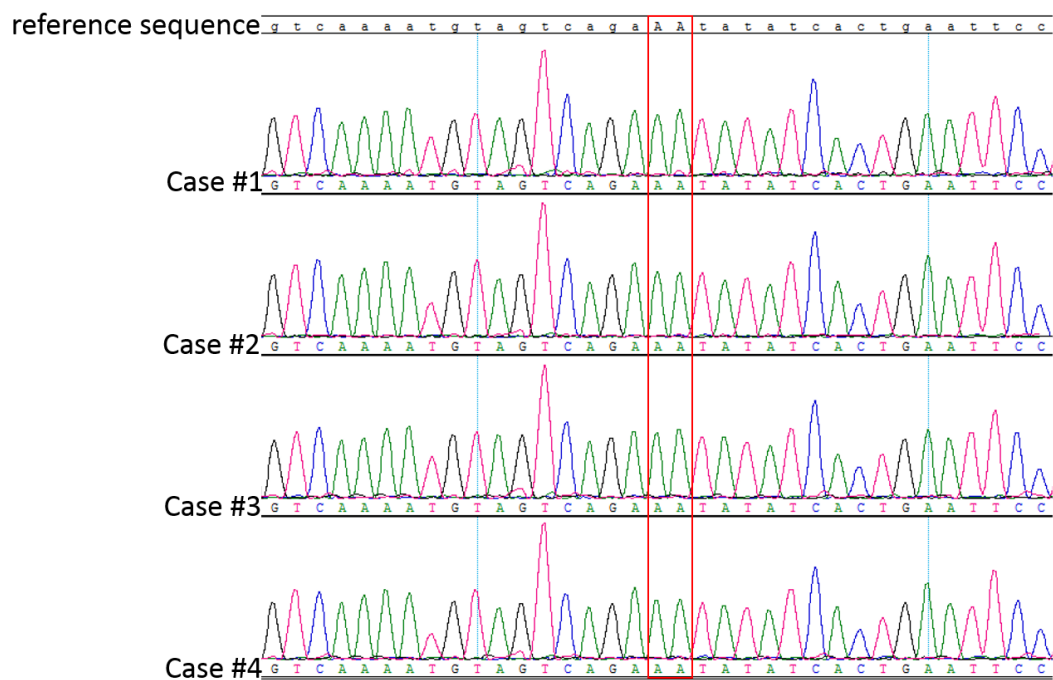

**Figure S5.** Sequencing of the candidate fragment of the *ADAMTS20* gene in the dogs, showing the lack of 2 bp deletion (in the frame).

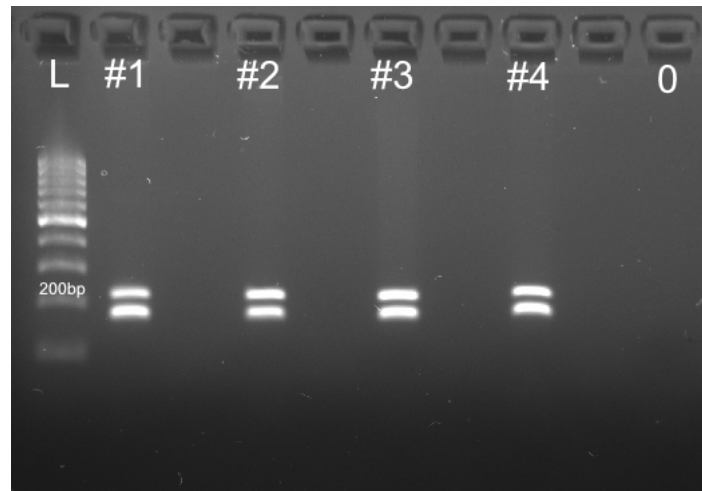

**Figure S6.** Agarose gel electrophoresis for the fragments in *DLX6* gene after PCR-duplex (222 bp: control amplicon; 172 bp fragment amplified if the LINE-1 insertion is not present in a homozygote status). L: DNA Ladder; 1–4: the affected puppies; 0: negative control (no DNA template).

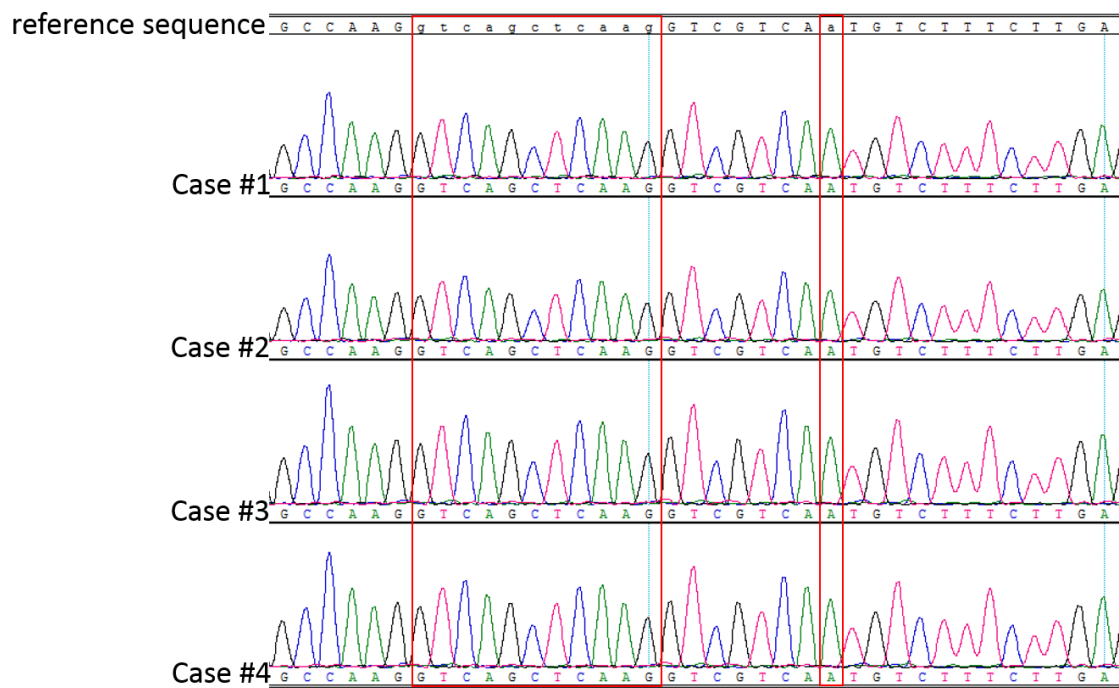

**Figure S7.** Sequencing of the candidate region of the *MYH3* gene in the four dogs showing the lack of 11-bp deletion and A>G substitution (in frames).
